# Supplementary material
Source: publisher figshare collection journal article supplement (https://tandf.figshare.com/ndownloader/files/20691216)
Supplement: Supplementary file 1 [file 20691216]

**Supplementary Table 1.** Maximum likelihood estimator infection rates (MLE) of ZIKV infected mosquitoes of Mexico collected in 2017 and 2018. NE: non-estimable by the MLE method.

|  | ***2017*** | | | | | | |
| --- | --- | --- | --- | --- | --- | --- | --- |
| **Specie** | | **MLE Infection Rate** | **Lower Limit** | **Upper Limit** | **Pools** | **Positive Pools** | **Individuals** |
| *Aedes aegypti* | | 18.60 | 16.37 | 21.05 | 2720 | 226 | 12542 |
| *Aedes albopictus* | | 143.48 | 66.85 | 259.79 | 38 | 7 | 50 |
| *Culex coronator* | | 102.8 | 25.31 | 305.99 | 4 | 2 | 17 |
| *Culex erraticus* | | NE | NE | NE | 1 | 1 | 1 |
| *Culex quinquefasciatus* | | 17.86 | 14.51 | 21.76 | 529 | 87 | 5205 |
|  | |  |  |  |  |  |  |
|  | ***2018*** | | | | | | |
| **Specie** | | **MLE Infection Rate** | **Lower Limit** | **Upper Limit** | **Pools** | **Positive Pools** | **Individuals** |
| *Aedes aegypti* | | 21.77 | 15.59 | 29.64 | 399 | 34 | 1602 |
| *Aedes epactius* | | 45.07 | 2.79 | 363.58 | 5 | 1 | 25 |
| *Culex quinquefasciatus* | | 10.84 | 5.38 | 19.69 | 135 | 9 | 849 |
| *Culex tarsalis* | | 247.22 | 88.36 | 492.73 | 12 | 4 | 17 |
| *Culiseta inornata* | | NE | NE | NE | 1 | 1 | 1 |
| *Culiseta particeps* | | 369.49 | 81.39 | 840.19 | 3 | 2 | 6 |
